# Supplementary material for: Staphylococcus aureus Specific Electrospun Wound Dressings: Influence of Immobilization Technique on Antibacterial Efficiency of Novel Enzybiotic
Source: MDPI journal article supplement (doi:10.3390/pharmaceutics13050711), 2021-05-13
Supplement: s1 [file s1]

# Supplementary Materials: *Staphylococcus aureus* Specific Electrospun Wound Dressings: Influence of Immobilization Technique on Antibacterial Efficiency of Novel Enzybiotic

Olga Urbanek, Alicja Wysocka, Paweł Nakielski, Filippo Pierini, Elżbieta Jagielska and Izabela Sabała

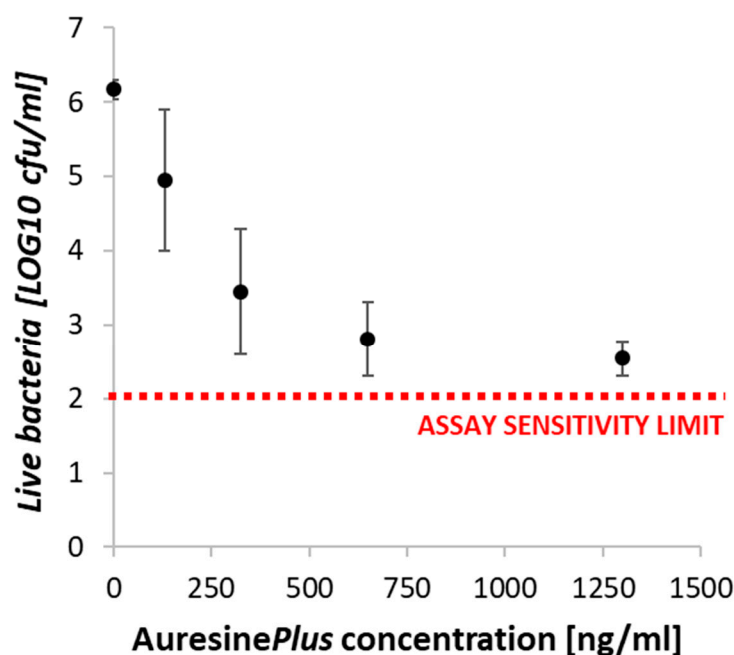

**Figure S1.** Calibration curve of the AuresinePlus antimicrobial activity. *S.aureus* NCTC 8325-4 bacterial cells ( $10^6$  CFU/mL) were subjected to the increasing amounts of the enzyme in the PBS buffer at room-temperature. The reaction was stopped after 3 h by adding the enzyme inhibitor, 1mM EDTA. Presented values show the number of live bacterial cells in log transformed CFU/mL. The bars represent standard deviation from two independent experiments.

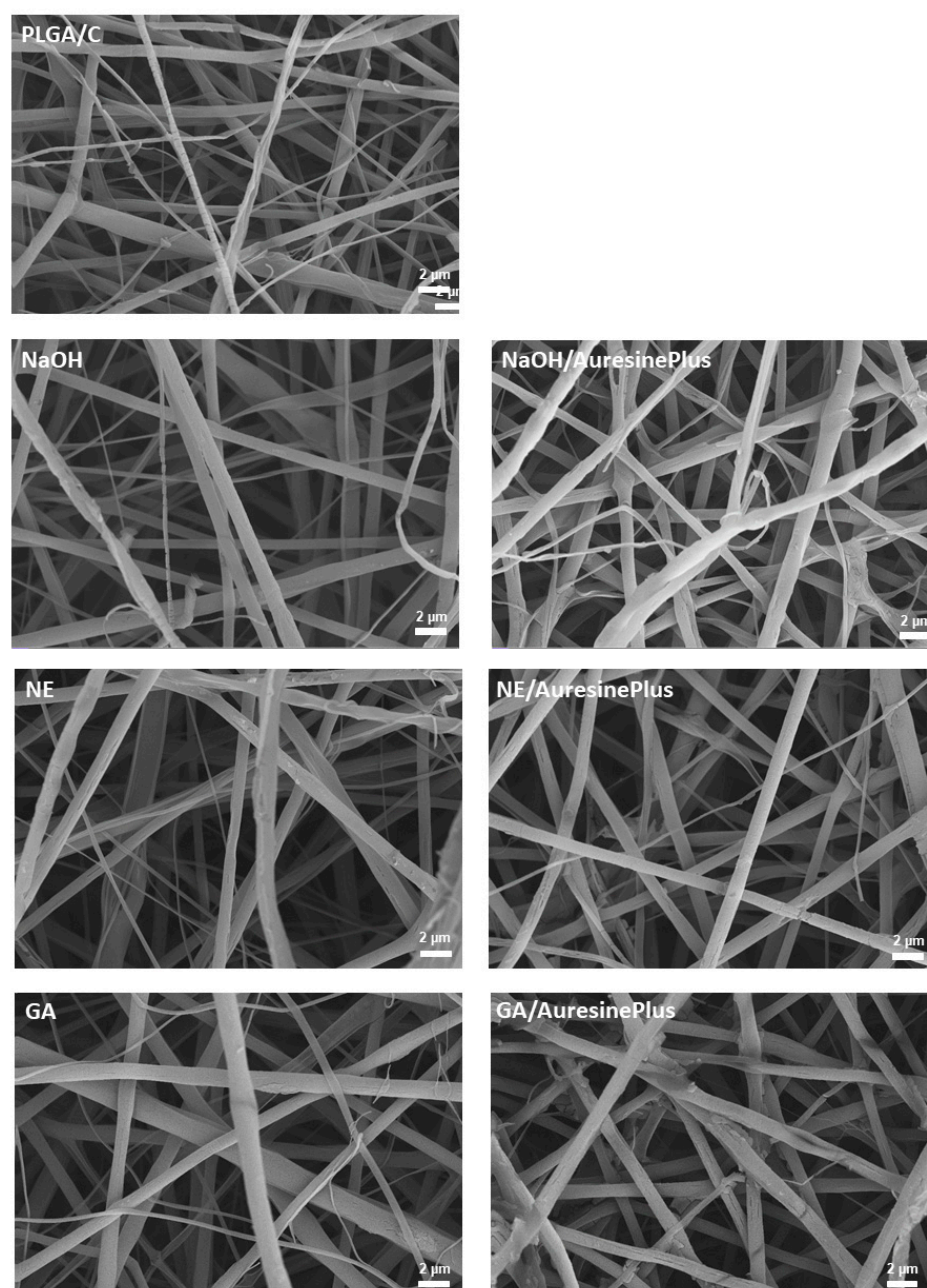

**Figure S2.** Field emission scanning electron microscope (FE-SEM) images illustrating homogeneity of bare fibers (PLGA/C), as well as fibers subjected to various methods for *AuresinePlus* immobilization.

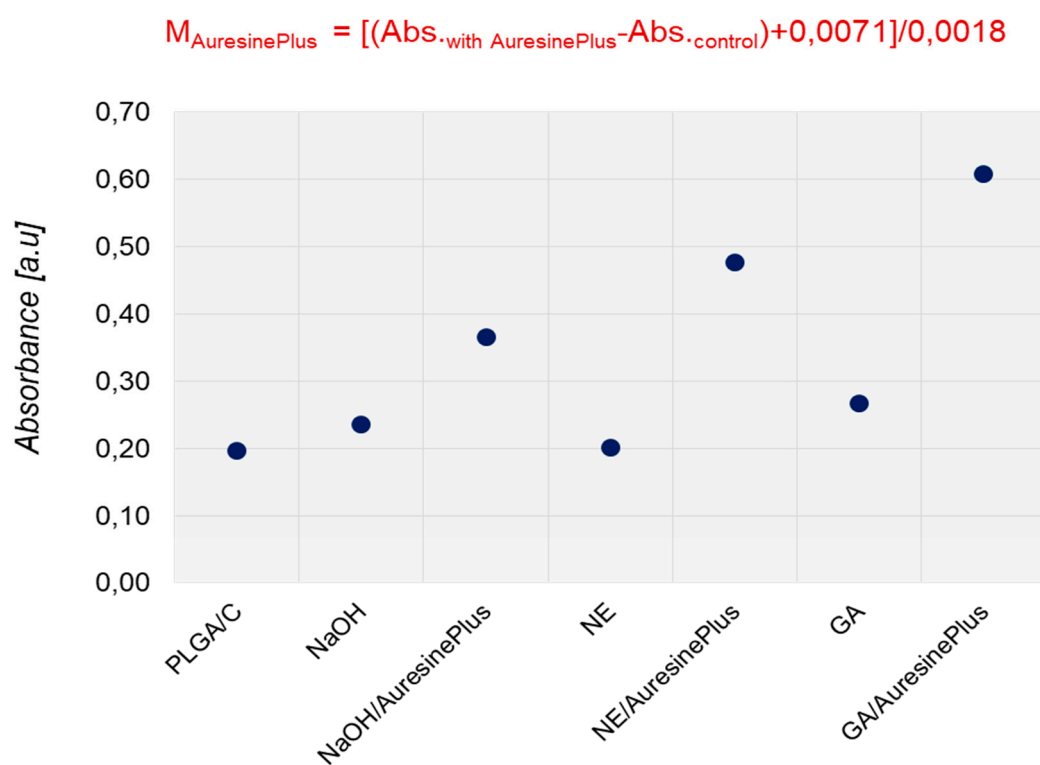

### Calibration curve

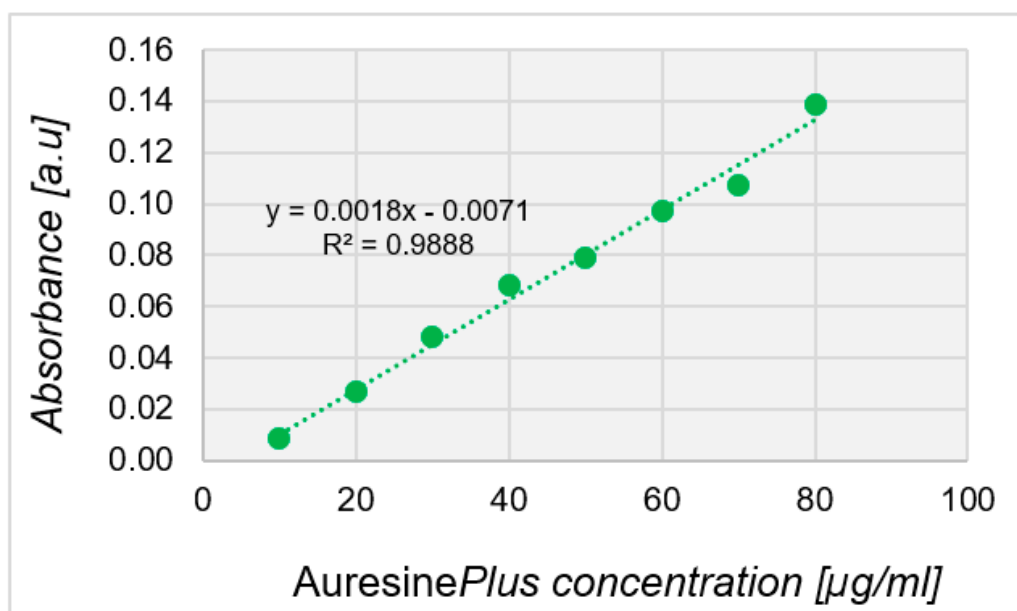

**Figure S3.** Determination of AuresinePlus amount attached to 1 mg of nonvowens. Calculations were done based on BCA assays as described in Material and Methods.

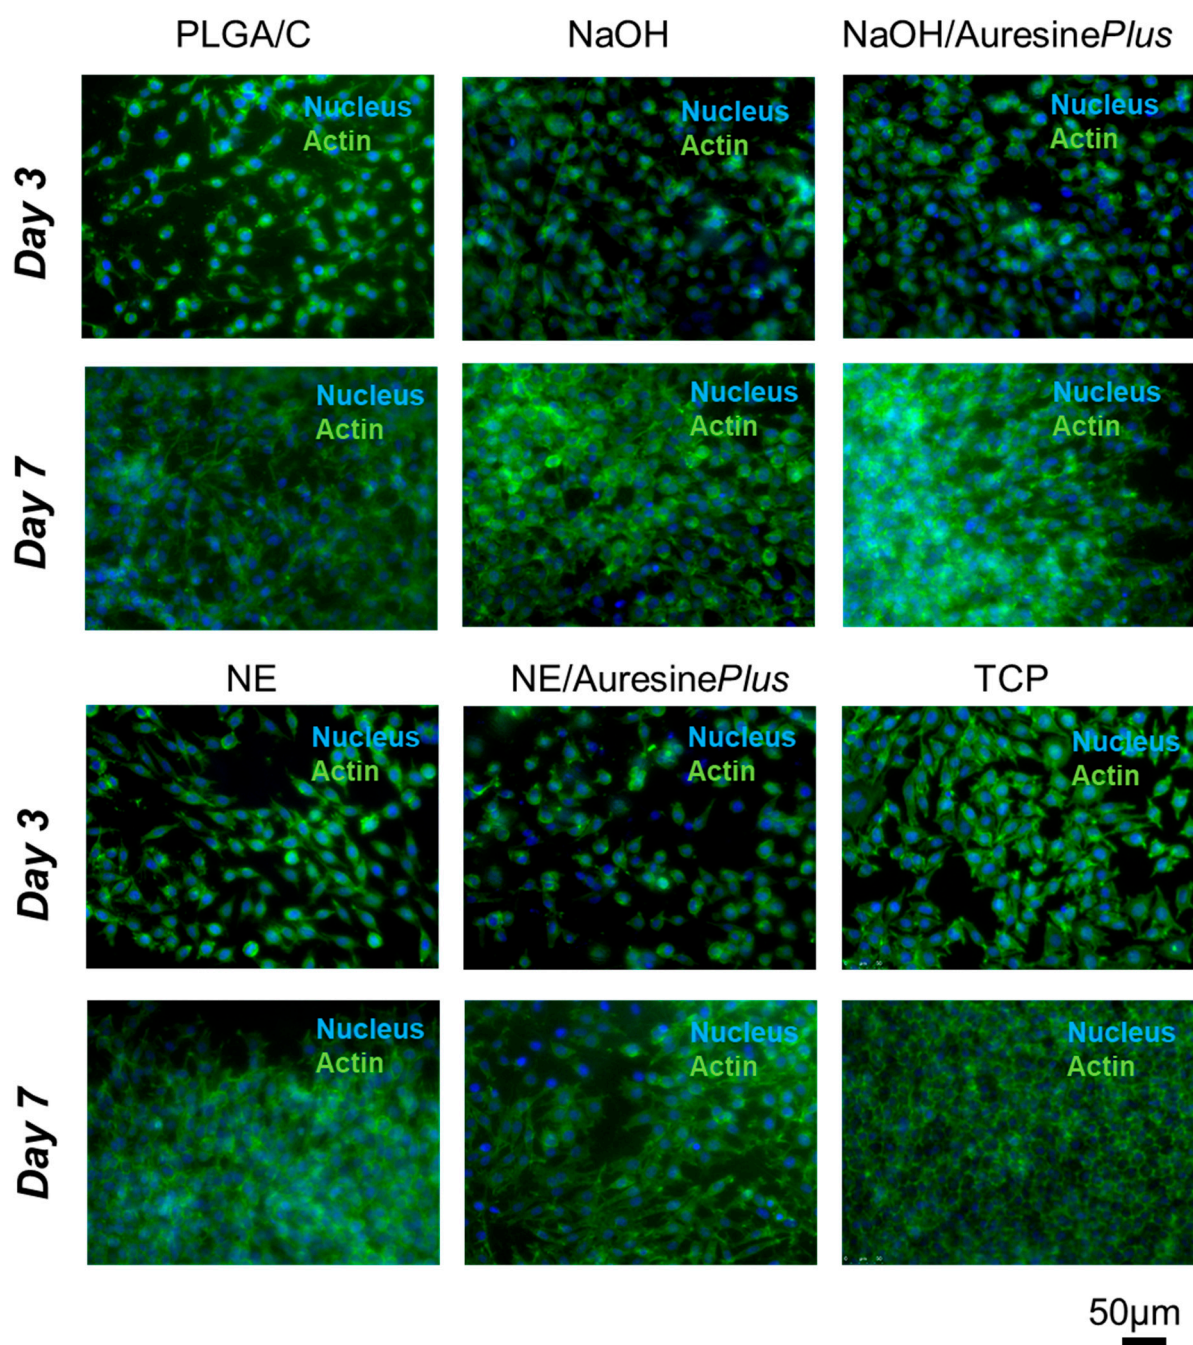

**Figure S4.** Morphology of fibroblast grown on various fibers and control conditions (TCP).

**Table S1.** Antimicrobial activity of the functionalized materials – *S.aureus* NCTC 8325-4 eradication upon direct-contact of nonwovens with immobilized AuresinePlus and the respective controls. Around  $10^6$  CFU/ml of bacterial cells in PBS was incubated on the nonwoven surface for 3 hours. Presented values show the number of eradicated bacterial cells in cfu per ml and in relative (%) to the number of bacteria suspended in PBS alone and kept for 3 hours in the same conditions, Arrows indicate **decrease (eradication)** or **increase (growth)** of the bacterial cell number.

| Sample Name                     | NaOH/<br>AuresinePlus                                    | NaOH                                                        | NE/<br>AuresinePlus                                      | NE                                                       | GA/<br>AuresinePlus                                        | GA                                                         | In Solution                                              | PLGA/C                                                       |
|---------------------------------|----------------------------------------------------------|-------------------------------------------------------------|----------------------------------------------------------|----------------------------------------------------------|------------------------------------------------------------|------------------------------------------------------------|----------------------------------------------------------|--------------------------------------------------------------|
| Eradicated<br>Bacteria Assay 1  | $9.21 \times 10^5$<br>(99.05%) ↓                         | $-1.48 \times 10^6$<br>(-158.66%) ↑                         | $7.23 \times 10^5$<br>(77.69%) ↓                         | $4.18 \times 10^5$<br>(44.92%) ↓                         | $-5.83 \times 10^5$<br>(-62.74%) ↑                         | $-3.75 \times 10^5$<br>(-62.74%) ↑                         | $9.21 \times 10^5$<br>(99.04%) ↓                         | $-2.04 \times 10^6$<br>(-219.61%) ↑                          |
| Eradicated<br>Bacteria, Assay 2 | $9.23 \times 10^5$<br>(100.00%) ↓                        | $1.16 \times 10^5$<br>(12.58%) ↓                            | $9.21 \times 10^5$<br>(99.76%) ↓                         | $5.79 \times 10^4$<br>(6.27%) ↓                          | $-2.52 \times 10^5$<br>(-27.26%) ↑                         | $-5.06 \times 10^5$<br>(-27.26%) ↑                         | $9.23 \times 10^5$<br>(100%) ↓                           | $1.02 \times 10^5$<br>(11%) ↓                                |
| Average ± SD                    | $9.22 \times 10^5$<br>± $1.52 \times 10^3$<br>(100 ± 1%) | $-6.80 \times 10^5$<br>± $1.13 \times 10^6$<br>(-73 ± 121%) | $8.22 \times 10^5$<br>± $1.40 \times 10^5$<br>(89 ± 16%) | $2.38 \times 10^5$<br>± $2.54 \times 10^5$<br>(26 ± 27%) | $-4.18 \times 10^5$<br>± $2.35 \times 10^5$<br>(-45 ± 25%) | $-6.55 \times 10^4$<br>± $6.22 \times 10^5$<br>(-45 ± 25%) | $9.22 \times 10^5$<br>± $1.60 \times 10^3$<br>(100 ± 1%) | $-9.70 \times 10^5$<br>± $1.52 \times 10^6$<br>(-104 ± 163%) |
